# Supplementary material
Source: Springer Nature journal article supplement (https://www.springermedizin.de/resource/supplementary/12885_2009_1768_MOESM8_ESM.pdf/9472888)

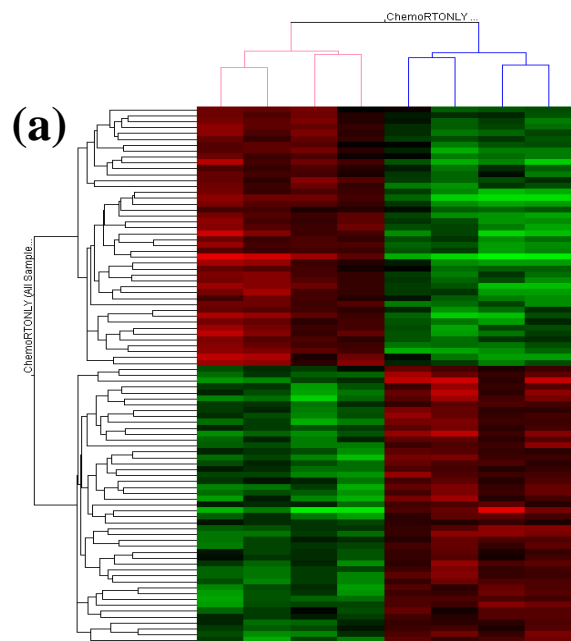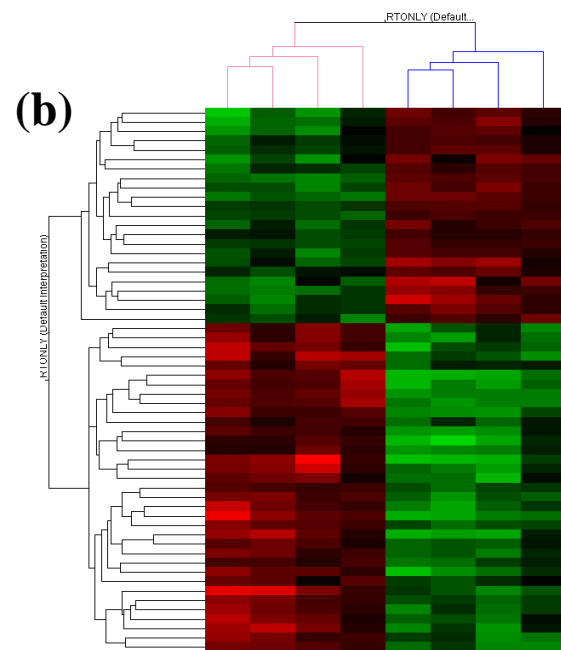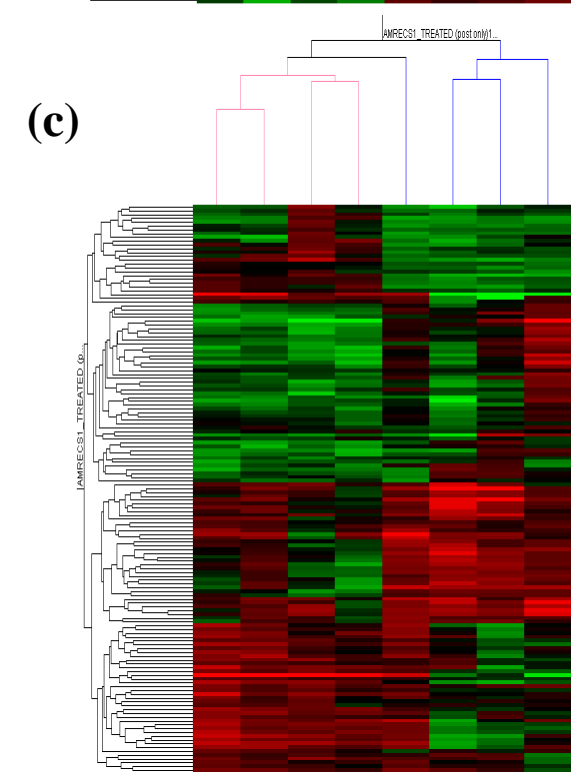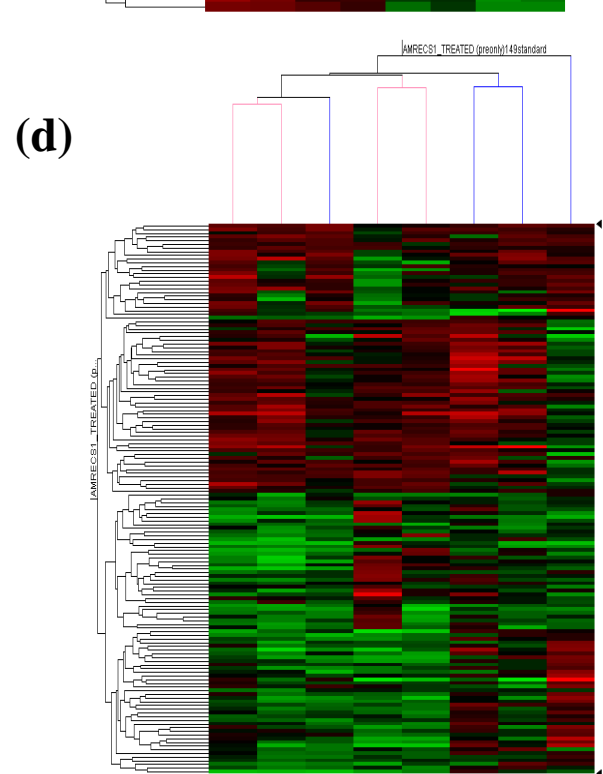

Supplement: MOESM8 [file 9472888]
